# Supplementary material for: Achieving a Cr6+-free Cr3+-activated spinel phosphor by a one-step solid-state reaction
Source: Royal Society of Chemistry journal article supplement (doi:10.1039/d4qi01446d), 2024-01-01
Supplement: d4qi01446d1.pdf [file d4qi01446d1.pdf]

## Supporting Information

### Achieving Cr<sup>6+</sup>-free Cr<sup>3+</sup>-activated spinel phosphor by one-step solid-state reaction

Yiqing Zhou,<sup>a</sup> Quantian Cao,<sup>a</sup> Yue Han,<sup>a</sup> Zhongxian Qiu,<sup>a,\*</sup> Jilin Zhang,<sup>a</sup> Wenli Zhou,<sup>a</sup> Shixun Lian<sup>a,\*</sup>

<sup>a</sup> Key Laboratory of Light Energy Conversion Materials of Hunan Province College, Key Laboratory of Chemical Biology & Traditional Chinese Medicine Research (Ministry of Education), College of Chemistry and Chemical Engineering, Hunan Normal University, Changsha 410081, China

**Corresponding authors' email:** zxqiu@hunnu.edu.cn (Z. Qiu);  
sxlian@hunnu.edu.cn (S. Lian)

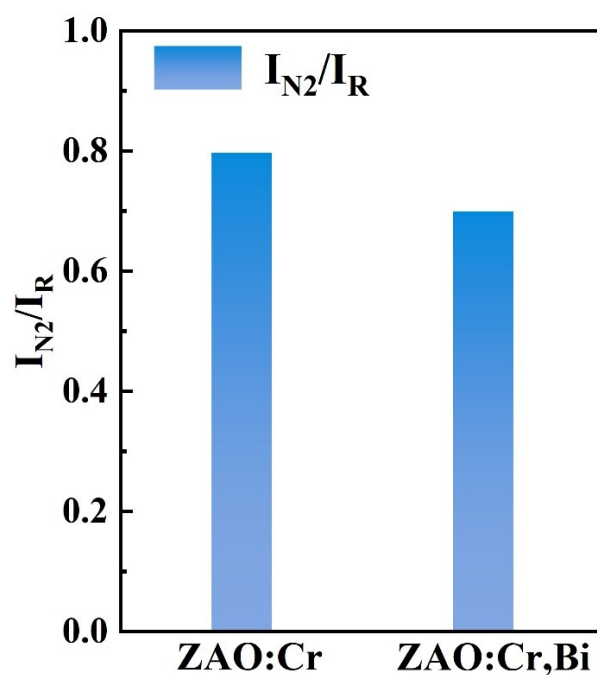

Figure S1. Emission intensity ratio of N<sub>2</sub>/R line.

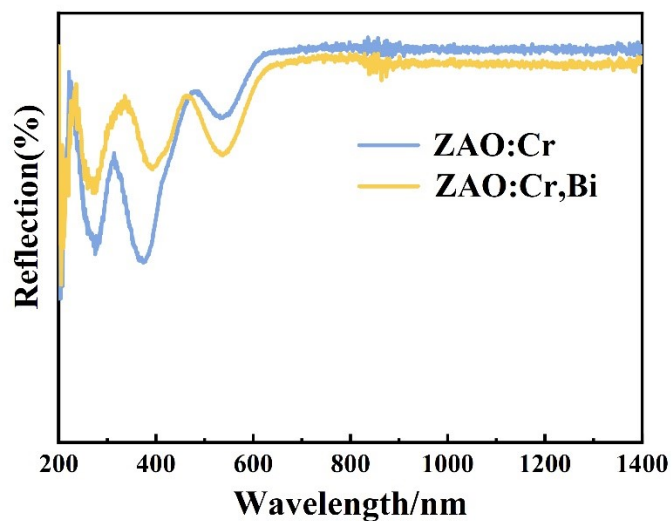

**Figure S2.** UV-NIR diffuse reflection spectra of ZAO:Cr and ZAO:Cr,Bi

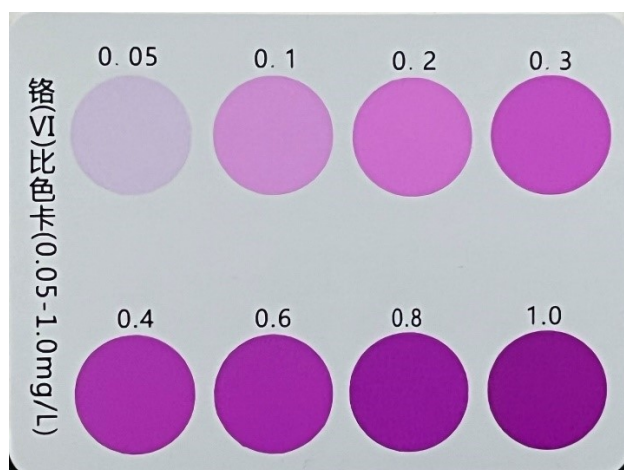

**Figure S3.** Chromium (VI) colorimetric card (0.05–1.0 mg/L)

**Table S1** Cationic compositions of ZAO:Cr and ZAO:Cr,Bi by ICP test

| Sample    |                | Elemental composition<br>(wt.%) |       |      |      | Elemental composition<br>(mol) |      |       |        | Atomic ratio |        |
|-----------|----------------|---------------------------------|-------|------|------|--------------------------------|------|-------|--------|--------------|--------|
|           |                | Zn                              | Al    | Cr   | Bi   | Zn                             | Al   | Cr    | Bi     | Zn/Al        | Cr/Al  |
| ZAO:Cr    | Nominal ratio  | 35.57                           | 29.05 | 0.57 | --   | 1                              | 1.98 | 0.02  | --     | 0.5051       | 0.0101 |
|           | As-synthesized | 37.86                           | 32.19 | 0.54 | --   | 1                              | 2.06 | 0.018 | --     | 0.4854       | 0.0087 |
|           | After washing  | 32.82                           | 30.38 | 0.45 | --   | 1                              | 2.24 | 0.017 | --     | 0.4464       | 0.0076 |
| ZAO:Cr,Bi | Nominal ratio  | 34.88                           | 28.20 | 0.55 | 2.23 | 1                              | 1.96 | 0.02  | 0.02   | 0.5102       | 0.0102 |
|           | As-synthesized | 35.14                           | 34.29 | 0.56 | 0.14 | 1                              | 2.36 | 0.02  | 0.0012 | 0.4237       | 0.0085 |
|           | After washing  | 36.58                           | 33.91 | 0.59 | 0.14 | 1                              | 2.25 | 0.02  | 0.0012 | 0.4444       | 0.0089 |

**Figure S4a** shows the comparison of the PL and PLE spectra of the singly doped ZAO:Cr and ZAO:Bi phosphors. **Figure S4b** display the fluorescence decay curves of  $\text{Bi}^{3+}$  in ZAO:yCr,Bi ( $y = 0, 0.01, \text{ and } 0.03$ ) phosphors. Each case follows a double exponential decay behavior and can be fitted by Equation S1:

$$I_t = I_0 + A_1 \exp\left(\frac{-t}{\tau_1}\right) + A_2 \exp\left(\frac{-t}{\tau_2}\right) \quad (\text{S1}),$$

where,  $I_t$  and  $I_0$  denote the luminescence intensities at time  $t$  and  $t = 0$ ,  $A_1$  and  $A_2$  are the corresponding fitting parameters, and  $\tau_1$  and  $\tau_2$  represent the fast and slow components of the decay time. The average decay time ( $\tau$ ) is calculated by

$$\tau = \frac{A_1 \tau_1^2 + A_2 \tau_2^2}{A_1 \tau_1 + A_2 \tau_2} \quad (\text{S2}).$$

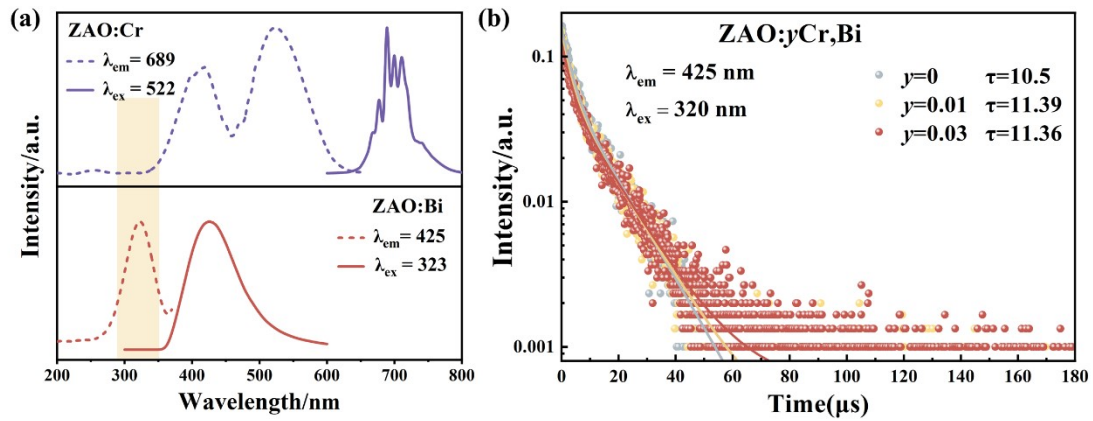

**Figure S4.** (a) PLE and PL spectra of ZAO:Cr and ZAO:Bi, respectively; (b) Fluorescence decay curves of ZAO:yCr,Bi.

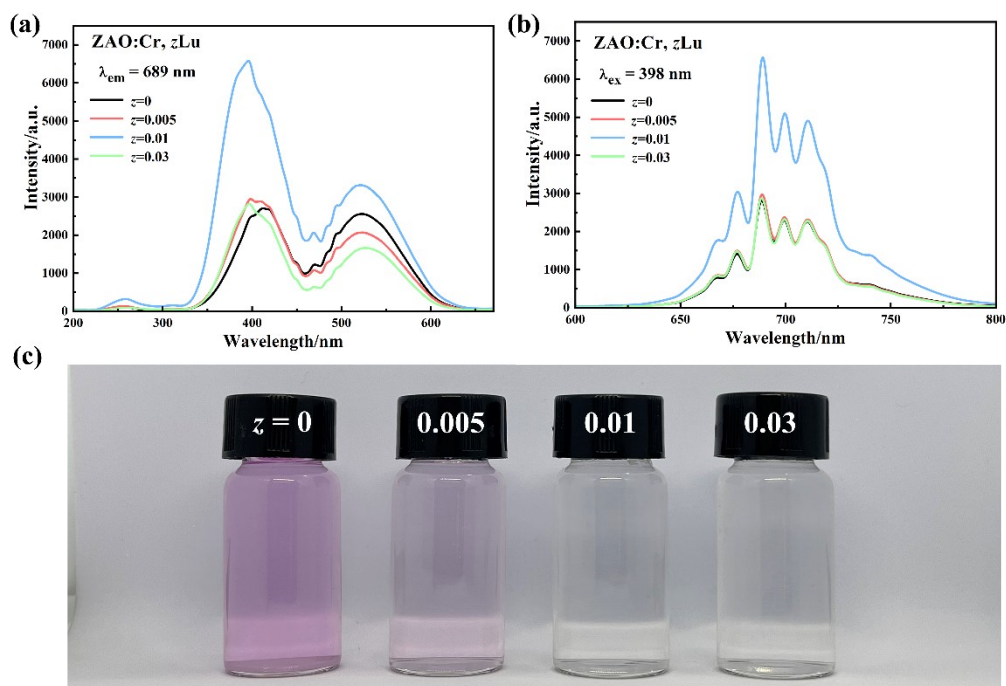

**Figure S5.** ZAO:Cr, $z$ Lu ( $z = 0$ – $0.03$ ): (a) PLE spectra; (b) PL spectra; (c) color reaction of  $\text{Cr}^{6+}$  detection reagent in washing solutions of the samples.
